# Supplementary material for: Outcomes among confirmed cases and a matched comparison group in the Long-COVID in Scotland study
Source: PubMed Central journal article supplement (PMC9556711; doi:10.1038/s41467-022-33415-5), 2022-10-12
Supplement: 41467_2022_33415_MOESM1_ESM.pdf [file 41467_2022_33415_MOESM1_ESM.pdf]

Outcomes among confirmed cases and a matched comparison group in the Long-COVID in Scotland Study

**Supplementary Table 1.** Overall recruitment rates by follow-up time

| Follow-up period |                   | Test result |          | Total   |
|------------------|-------------------|-------------|----------|---------|
|                  |                   | Negative    | Positive |         |
| 6 months         | Invitations       | 466,890     | 158,425  | 625,315 |
|                  | Responses         | 60,413      | 30,165   | 90,578  |
|                  | Response rate (%) | 13%         | 19%      | 14%     |
| 12 months        | Invitations       | 180,684     | 61,728   | 242,412 |
|                  | Responses         | 14,886      | 7,077    | 21,963  |
|                  | Response rate (%) | 8%          | 11%      | 9%      |
| 18 months        | Invitations       | 6,382       | 2,243    | 8,625   |
|                  | Responses         | 621         | 313      | 934     |
|                  | Response rate (%) | 10%         | 14%      | 11%     |

**Supplementary Table 2.** Recovery status in symptomatic participants with serial questionnaire data, by follow-up time

|                  | Participated at 6 and 12 months<br>N=3,744 |                                 | Participated at 12 and 18 months<br>N=197 |                                 |
|------------------|--------------------------------------------|---------------------------------|-------------------------------------------|---------------------------------|
|                  | Recovery status<br>at 6 months             | Recovery status<br>at 12 months | Recovery status<br>at 12 months           | Recovery status<br>at 18 months |
| Fully recovered  | 1,683 (45%)                                | 1,736 (46%)                     | 76 (39%)                                  | 75 (38%)                        |
| Not recovered    | 295 (8%)                                   | 303 (8%)                        | 21 (11%)                                  | 21 (11%)                        |
| Partly recovered | 1,766 (47%)                                | 1,705 (46%)                     | 100 (51%)                                 | 101 (51%)                       |

**Supplementary Table 3.** Crude outcomes in symptomatic participants with serial questionnaire data, by follow-up time

|                                   | Participated at 6 and 12 months<br>N=3,744 |            |                  | Participated at 12 and 18 months<br>N=197 |           |                  |
|-----------------------------------|--------------------------------------------|------------|------------------|-------------------------------------------|-----------|------------------|
|                                   | 6 months                                   | 12 months  | <i>p</i> -value* | 12 months                                 | 18 months | <i>p</i> -value* |
| Symptoms in last week             | N (%)                                      | N (%)      |                  | N (%)                                     | N (%)     |                  |
| Tiredness                         | 1,831 (49)                                 | 1,812 (48) | 0.552            | 100 (51)                                  | 105 (53)  | 0.515            |
| Headache                          | 1,009 (27)                                 | 1,029 (27) | 0.510            | 53 (27)                                   | 59 (30)   | 0.387            |
| Muscle aches/weakness             | 1,074 (29)                                 | 1,057 (28) | 0.553            | 62 (31)                                   | 74 (38)   | 0.052            |
| Joint pain                        | 861 (23)                                   | 875 (23)   | 0.599            | 63 (32)                                   | 64 (32)   | 0.884            |
| Breathless                        | 928 (25)                                   | 906 (24)   | 0.403            | 49 (25)                                   | 56 (28)   | 0.237            |
| Anxious/depressed                 | 836 (22)                                   | 816 (22)   | 0.455            | 48 (24)                                   | 51 (26)   | 0.631            |
| Confused/difficulty concentrating | 575 (15)                                   | 534 (14)   | 0.065            | 31 (16)                                   | 30 (15)   | 0.847            |
| Sleep problems                    | 988 (26)                                   | 1,038 (28) | 0.085            | 58 (29)                                   | 70 (36)   | 0.070            |
| Dry cough                         | 399 (11)                                   | 566 (15)   | <0.001           | 31 (16)                                   | 30 (15)   | 0.873            |
| Cough with phlegm                 | 360 (10)                                   | 551 (15)   | <0.001           | 17 (9)                                    | 30 (15)   | 0.016            |
| Change in taste                   | 465 (12)                                   | 345 (9)    | <0.001           | 17 (9)                                    | 14 (7)    | 0.491            |
| Change in smell                   | 533 (14)                                   | 391 (10)   | <0.001           | 21 (11)                                   | 15 (8)    | 0.201            |
| Problems hearing                  | 231 (6)                                    | 253 (7)    | 0.214            | 17 (9)                                    | 19 (10)   | 0.617            |
| Problems with eyesight            | 315 (8)                                    | 289 (8)    | 0.165            | 16 (8)                                    | 21 (11)   | 0.251            |
| Pins and needles                  | 477 (13)                                   | 460 (12)   | 0.439            | 36 (18)                                   | 33 (17)   | 0.578            |
| Chest pain                        | 274 (7)                                    | 284 (8)    | 0.565            | ≤10                                       | 19 (10)   | -                |
| Palpitations                      | 348 (9)                                    | 377 (10)   | 0.123            | 32 (16)                                   | 32 (16)   | 1.000            |
| Poor appetite                     | 218 (6)                                    | 235 (6)    | 0.326            | 15 (8)                                    | 18 (9)    | 0.513            |
| Abdominal pain                    | 276 (7)                                    | 314 (8)    | 0.048            | 17 (9)                                    | 16 (8)    | 0.835            |
| Sickness/vomiting                 | 239 (6)                                    | 245 (7)    | 0.742            | 16 (8)                                    | 19 (10)   | 0.439            |
| Diarrhea                          | 323 (9)                                    | 352 (9)    | 0.160            | 27 (14)                                   | 20 (10)   | 0.162            |
| Constipation                      | 197 (5)                                    | 192 (5)    | 0.759            | 16 (8)                                    | 11 (6)    | 0.225            |
| Weight loss                       | 79 (2)                                     | 85 (2)     | 0.567            | ≤10                                       | ≤10       | -                |
| Dizzy/blackouts/fits              | 194 (5)                                    | 179 (5)    | 0.346            | 15 (8)                                    | 14 (7)    | 0.796            |
| Balance problems                  | 243 (6)                                    | 267 (7)    | 0.174            | 15 (8)                                    | 21 (11)   | 0.157            |

|                                              |            |            |        |            |            |       |
|----------------------------------------------|------------|------------|--------|------------|------------|-------|
| Skin rash                                    | 174 (5)    | 150 (4)    | 0.088  | ≤10        | ≤10        | -     |
| No symptoms now                              | 996 (27)   | 1,008 (27) | 0.669  | 52 (26)    | 54 (27)    | 0.763 |
| Difficulties with activities of daily living |            |            |        |            |            |       |
| Walking; getting around                      | 809 (22)   | 807 (22)   | 0.932  | 45 (23)    | 54 (27)    | 0.106 |
| Housework; DIY; chores                       | 870 (23)   | 876 (23)   | 0.807  | 57 (29)    | 56 (28)    | 0.869 |
| Working; studying                            | 860 (23)   | 818 (22)   | 0.104  | 64 (32)    | 55 (28)    | 0.139 |
| Washing; dressing                            | 251 (7)    | 282 (8)    | 0.042  | 15 (8)     | 23 (12)    | 0.033 |
| Exercise; sport                              | 1,068 (29) | 1,080 (29) | 0.663  | 60 (30)    | 64 (32)    | 0.537 |
| Hobbies                                      | 421 (11)   | 449 (12)   | 0.169  | 27 (14)    | 29 (15)    | 0.683 |
| Relationships                                | 429 (11)   | 479 (13)   | 0.014  | 25 (13)    | 31 (16)    | 0.239 |
| EQ-5D                                        | N=3,707    | N=3,665    |        | N=195      | N=192      |       |
| Median (IQR)                                 | 75 (55-85) | 73 (52-85) | <0.001 | 70 (50-80) | 66 (50-80) | 0.667 |

\* Wilcoxon signed-rank test for EQ-5D; McNemar's  $\chi^2$  test for other variables. All tests are two-sided.

## Supplementary Figure 1. Self-completed Questionnaire

Q1. Have you ever had a positive Covid-19 test? (yes/no)

Q2. Have you had a Covid-19 vaccine? (yes/no)

Q3. What Covid-19 symptoms did you have? [only if Q1 yes] (select all that apply)  
Fever; Cough; Change in taste; Change in smell; Tiredness (fatigue); Headache; Ear pain;  
Runny nose; Muscle aches or weakness; Joint pain; Breathlessness; Chest pain; Sore throat;  
Hoarse voice; Loss of appetite; Stomach (abdominal) pain; Diarrhoea; Confusion; Seizures;  
Hair loss; Unconscious/semi-conscious; I didn't have any symptoms [go to Q5]

Q4. How long did your symptoms last?  
Less than 1 week; 1-4 weeks; More than 4 weeks

Q5. How do you feel now?  
Fully recovered; Partly recovered; Not recovered

Q6. Before your Covid-19 test, did you have any health issues or medical conditions?  
Yes; No [go to Q8]

Q7. Which health issues or medical conditions did you have? (select all that apply)  
Arthritis; Asthma/bronchitis/COPD; Cancer; Cystic fibrosis; Deep vein thrombosis;  
Depression/anxiety; Diabetes; Heart disease; Heart failure; High blood pressure; HIV; Home  
oxygen; Kidney disease; Liver disease; Neurological condition; Overweight; Obese;  
Pulmonary embolism; Pulmonary fibrosis; Stroke; I didn't have any of these [go to Q8]

Q8. Have you experienced any of the following in the last week? (select all that apply)  
Dry cough; Cough with phlegm; Change in taste; Change in smell; Problems hearing;  
Problems with eyesight; Tired; Headache; Muscle aches/weakness; Pins and needles; Joint  
pain; Breathless; Chest pain; Palpitations; Poor appetite; Stomach (abdominal) pain; Feeling  
sick/vomiting; Diarrhoea; Constipation; Weight loss; Anxious/depressed;  
Confusion/difficulty concentrating; Dizzy/blackouts/fits; Balance problems; Skin rash;  
Problems sleeping; I haven't experienced any of these [go to Q10]

Q9. Are any of these new or worse since your Covid-19 test? (select all that apply)  
Response list from Q8; None of these are new or worse [go to Q10]

Q10. Is your current health causing you difficulty with any of the following? Select all that  
apply.  
Walking/getting around; Housework/DIY/chores; Working/studying; Washing/dressing;  
Exercise/sports; Hobbies; Relationships; None of these apply [go to Q12; if also no to Q2 go  
to Q13]

Q11. Which of the difficulties you're experiencing are new/worse since having your Covid-  
19 test? (select all that apply)  
Response list from Q10; None of these are new or worse [go to Q13]

Q12. Has your job changed since your Covid-19 test?

No change; Different due to my Covid-19 illness; Different for other reasons; None of these apply

Q13. What is your ethnicity?

White Scottish; White Other British; White Irish; White Gypsy/Traveller; White Polish; Other white ethnic group; Mixed or multiple ethnic groups; Pakistani, Pakistani Scottish or Pakistani British; Indian, Indian Scottish or Indian British; Bangladeshi, Bangladeshi Scottish or Bangladeshi British; Chinese, Chinese Scottish or Chinese British; Other Asian, Asian Scottish or Asian British; African, African Scottish or African British; Other African; Caribbean, Caribbean Scottish or Caribbean British; Black, Black Scottish or Black British; Other Caribbean or Black; Arab, Arab Scottish or Arab British; Other ethnic group; Prefer not to say

Q14. How would you rate your health today?

EQ-5D thermometer (0 Worst health I can imagine – 100 Best health I can imagine)

**Supplementary Figure 2.** Heat map of current symptom clusters among people who had symptomatic COVID-19 infection

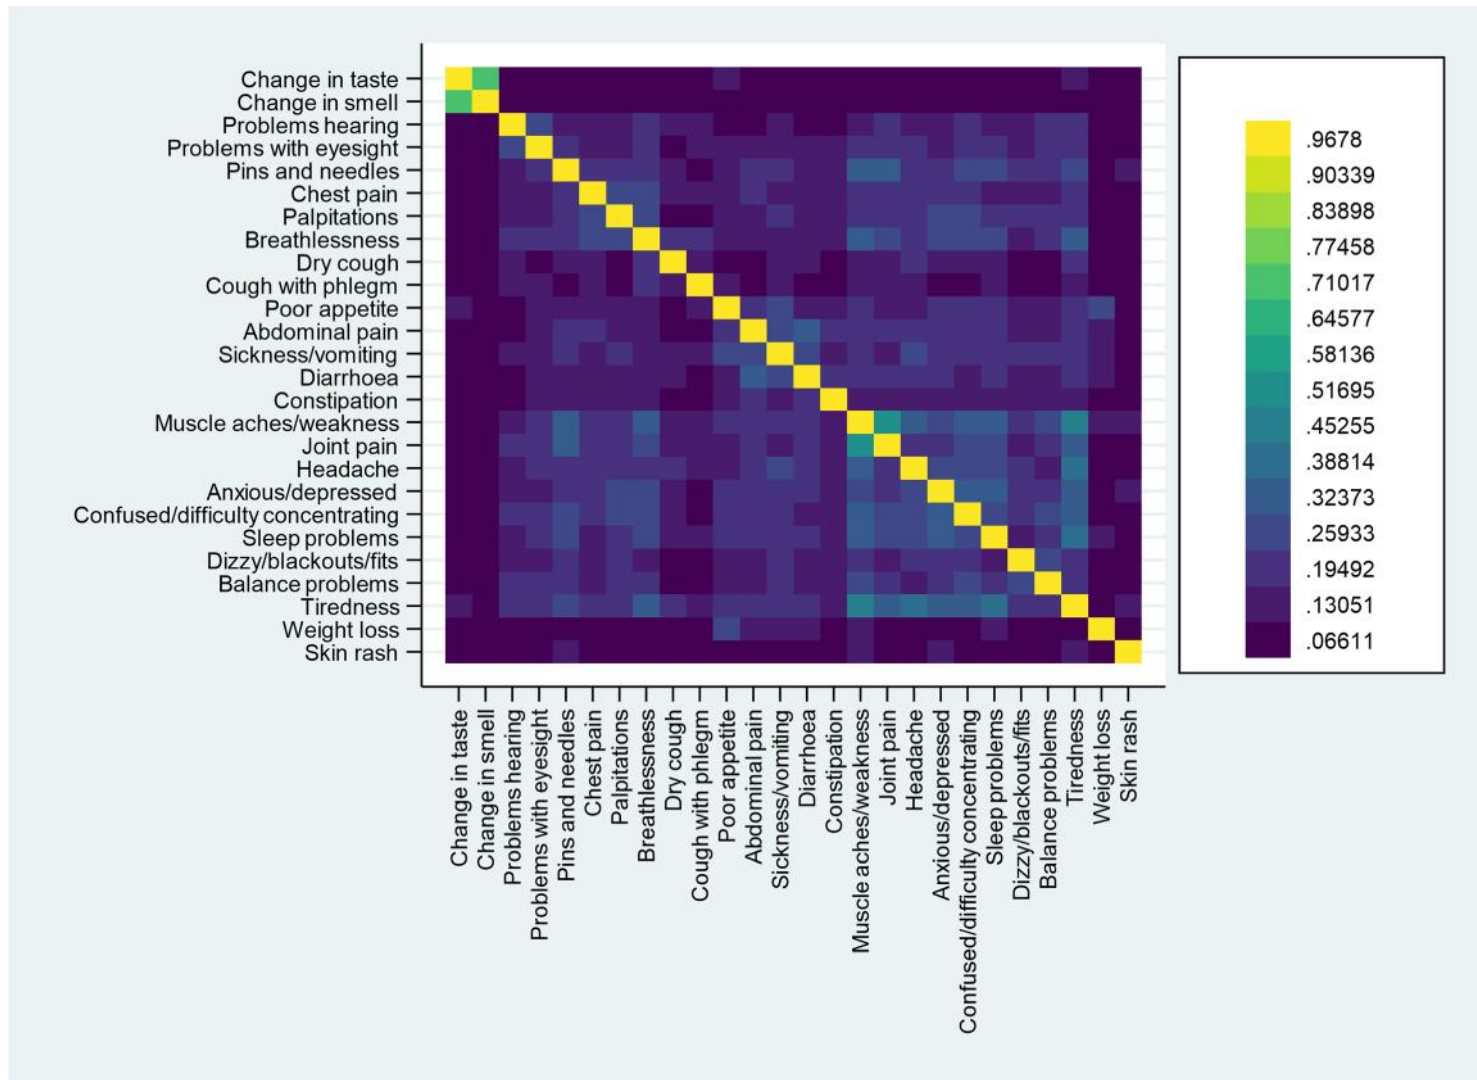

Values refer to the correlation coefficient.
